# Supplementary material
Source: ML conference proceedings conference paper supplement (https://proceedings.neurips.cc/paper_files/paper/2021/hash/9a86d531e19ec6f5937ad1373bb118bd-Abstract.html)
Supplement: Supplementary file 1 [file 9a86d531e19ec6f5937ad1373bb118bd-Supplemental.zip]

Archive with 2 entries (2 files):
- code.zip
- Heavy_Ball_Ordinary_Differential_Equations.pdf
